# Supplementary material for: Meta-Analysis of Differentially Expressed Genes in the Substantia Nigra in Parkinson’s Disease Supports Phenotype-Specific Transcriptome Changes
Source: Front Neurosci. 2020 Dec 18;14:596105. doi: 10.3389/fnins.2020.596105 (PMC7775392; doi:10.3389/fnins.2020.596105)
Supplement: Supplementary file 2 [file Table_2.XLSX]

## Sheet: Sheet1
Supplementary Table 2. List of all differentially expressed genes in the substantia nigra of Parkinson's disease from meta-analysis
HGNC symbol	Gene names	Log2 fold change	FDR	trends of expression
KCNJ2	potassium inwardly rectifying channel subfamily J member 2	0.676049	0.00121807	up-regulated
INSR	insulin receptor	0.700371	0.000798377	up-regulated
SLCO4A1	solute carrier organic anion transporter family member 4A1	1.51084	0.000131116	up-regulated
PRPF4B	pre-mRNA processing factor 4B	0.765161	1.70585e-08	up-regulated
CDKN2C	cyclin dependent kinase inhibitor 2C	0.712108	3.16767e-08	up-regulated
CTDSP2	CTD small phosphatase 2	0.499553	1.52811e-07	up-regulated
CXXC1	CXXC finger protein 1	0.343604	6.54596e-08	up-regulated
KAT6A	lysine acetyltransferase 6A	0.538524	1.34693e-07	up-regulated
HBP1	HMG-box transcription factor 1	0.363118	0.000868032	up-regulated
SIRT7	sirtuin 7	0.337385	1.68317e-07	up-regulated
MKNK2	MAPK interacting serine/threonine kinase 2	0.900898	1.7366e-07	up-regulated
KAT2A	lysine acetyltransferase 2A	0.528095	0.000273	up-regulated
SLCO3A1	solute carrier organic anion transporter family member 3A1	0.755686	4.53492e-07	up-regulated
ZRSR2	zinc finger CCCH-type, RNA binding motif and serine/arginine rich 2	0.321681	0.000528292	up-regulated
CLK1	CDC like kinase 1	0.642327	0.00127722	up-regulated
SH3BP4	SH3 domain binding protein 4	0.432922	8.68596e-06	up-regulated
PLOD3	procollagen-lysine,2-oxoglutarate 5-dioxygenase 3	0.495773	6.56626e-07	up-regulated
BCL6	BCL6 transcription repressor	0.657642	4.64114e-06	up-regulated
PIAS4	protein inhibitor of activated STAT 4	0.315469	3.20404e-06	up-regulated
CREBBP	CREB binding protein	0.47921	1.83894e-06	up-regulated
RBM6	RNA binding motif protein 6	0.396101	2.02323e-06	up-regulated
STK38	serine/threonine kinase 38	0.423291	2.55518e-06	up-regulated
H2BC5	H2B clustered histone 5	0.878678	1.24937e-05	up-regulated
CD22	CD22 molecule	0.434956	6.07824e-05	up-regulated
COL5A3	collagen type V alpha 3 chain	0.49522	6.15418e-06	up-regulated
CRYAB	crystallin alpha B	0.386457	5.48917e-05	up-regulated
TCF12	transcription factor 12	0.410382	0.00116318	up-regulated
CHORDC1	cysteine and histidine rich domain containing 1	0.88322	3.94424e-06	up-regulated
MYOT	myotilin	0.808368	0.000789162	up-regulated
KLHL2	kelch like family member 2	0.37747	0.00050826	up-regulated
PTPRK	protein tyrosine phosphatase receptor type K	0.398373	5.74685e-06	up-regulated
MAFF	MAF bZIP transcription factor F	1.4136	7.76195e-06	up-regulated
PDGFA	platelet derived growth factor subunit A	0.496513	0.000163531	up-regulated
FBXW4	F-box and WD repeat domain containing 4	0.396945	9.46476e-06	up-regulated
FLT1	fms related tyrosine kinase 1	0.749652	1.06994e-05	up-regulated
NUPR1	nuclear protein 1, transcriptional regulator	0.613732	9.84078e-05	up-regulated
ITPK1	inositol-tetrakisphosphate 1-kinase	0.20946	7.66544e-05	up-regulated
RELN	reelin	0.842162	0.000323317	up-regulated
ABCA8	ATP binding cassette subfamily A member 8	0.583866	0.000234194	up-regulated
PABPN1	poly(A) binding protein nuclear 1	0.301439	1.61187e-05	up-regulated
SRRT	serrate, RNA effector molecule	0.310571	1.73969e-05	up-regulated
ATF4	activating transcription factor 4	0.391105	2.87403e-05	up-regulated
CBS	cystathionine beta-synthase	0.309903	2.16459e-05	up-regulated
SMC1A	structural maintenance of chromosomes 1A	0.476796	2.74367e-05	up-regulated
PCF11	PCF11 cleavage and polyadenylation factor subunit	0.411081	2.30195e-05	up-regulated
RPL38	ribosomal protein L38	0.539512	2.64019e-05	up-regulated
DHFR	dihydrofolate reductase	0.446447	0.000412435	up-regulated
PKD1	polycystin 1, transient receptor potential channel interacting	0.389894	7.89837e-05	up-regulated
MUTYH	mutY DNA glycosylase	0.190034	2.89921e-05	up-regulated
REPIN1	replication initiator 1	0.262158	3.85933e-05	up-regulated
ZIC1	Zic family member 1	0.64823	4.41132e-05	up-regulated
MAML1	mastermind like transcriptional coactivator 1	0.196052	3.51836e-05	up-regulated
CBFA2T2	CBFA2/RUNX1 partner transcriptional co-repressor 2	0.325836	5.2342e-05	up-regulated
CNOT2	CCR4-NOT transcription complex subunit 2	0.399312	4.72591e-05	up-regulated
ATP8B1	ATPase phospholipid transporting 8B1	0.481213	5.05629e-05	up-regulated
RELA	RELA proto-oncogene, NF-kB subunit	0.361204	4.92451e-05	up-regulated
TAZ	tafazzin	0.157858	5.29926e-05	up-regulated
RAF1	Raf-1 proto-oncogene, serine/threonine kinase	0.316799	0.000662217	up-regulated
RGL2	ral guanine nucleotide dissociation stimulator like 2	0.388903	8.70684e-05	up-regulated
LHPP	phospholysine phosphohistidine inorganic pyrophosphate phosphatase	0.56814	0.000126314	up-regulated
SOS2	SOS Ras/Rho guanine nucleotide exchange factor 2	0.365289	6.17267e-05	up-regulated
LPP	LIM domain containing preferred translocation partner in lipoma	0.474067	8.81658e-05	up-regulated
SNAP23	synaptosome associated protein 23	0.519537	7.19594e-05	up-regulated
PNRC1	proline rich nuclear receptor coactivator 1	0.292229	9.05952e-05	up-regulated
PELI1	pellino E3 ubiquitin protein ligase 1	0.477794	7.64731e-05	up-regulated
NACA	nascent polypeptide associated complex subunit alpha	0.370968	0.000124394	up-regulated
IL17RB	interleukin 17 receptor B	0.50907	9.88298e-05	up-regulated
SIRT2	sirtuin 2	0.363094	9.62874e-05	up-regulated
ABL1	ABL proto-oncogene 1, non-receptor tyrosine kinase	0.335205	0.000167172	up-regulated
MEIS2	Meis homeobox 2	0.308695	0.000590537	up-regulated
TGIF1	TGFB induced factor homeobox 1	0.365992	0.000142697	up-regulated
CHN2	chimerin 2	0.544342	0.000649144	up-regulated
NXF1	nuclear RNA export factor 1	0.300919	0.000100668	up-regulated
DDX17	DEAD-box helicase 17	0.731363	0.000131474	up-regulated
DUSP6	dual specificity phosphatase 6	0.636592	0.00014118	up-regulated
VCAN	versican	0.409855	0.00134507	up-regulated
MSX1	msh homeobox 1	0.534854	0.000124921	up-regulated
OPHN1	oligophrenin 1	0.314015	0.000139222	up-regulated
PPM1D	protein phosphatase, Mg2+/Mn2+ dependent 1D	0.516603	0.000137601	up-regulated
LBR	lamin B receptor	0.379013	0.000138326	up-regulated
VPS54	VPS54 subunit of GARP complex	0.322956	0.000184271	up-regulated
APAF1	apoptotic peptidase activating factor 1	0.336573	0.000152739	up-regulated
UIMC1	ubiquitin interaction motif containing 1	0.209896	0.000157137	up-regulated
CDKN1C	cyclin dependent kinase inhibitor 1C	0.55608	0.000174902	up-regulated
BAZ1A	bromodomain adjacent to zinc finger domain 1A	0.524106	0.000194179	up-regulated
TAF4	TATA-box binding protein associated factor 4	0.327947	0.000220335	up-regulated
LRP2	LDL receptor related protein 2	0.387256	0.00020931	up-regulated
TNS1	tensin 1	0.413312	0.000860239	up-regulated
HMG20B	high mobility group 20B	0.408	8.57765e-05	up-regulated
DOCK1	dedicator of cytokinesis 1	0.327858	0.000297769	up-regulated
TGFB3	transforming growth factor beta 3	0.436994	0.000353092	up-regulated
CDH2	cadherin 2	0.229693	0.000527771	up-regulated
NEDD9	neural precursor cell expressed, developmentally down-regulated 9	0.503043	0.000365922	up-regulated
ENTR1	endosome associated trafficking regulator 1	0.373841	0.00039226	up-regulated
ZNF302	zinc finger protein 302	0.36163	0.000430294	up-regulated
ERBIN	erbb2 interacting protein	0.46973	0.000396701	up-regulated
XPC	XPC complex subunit, DNA damage recognition and repair factor	0.230546	0.000390112	up-regulated
PKD2	polycystin 2, transient receptor potential cation channel	0.280637	0.000398366	up-regulated
RING1	ring finger protein 1	0.171064	0.00049867	up-regulated
CPQ	carboxypeptidase Q	0.301471	0.00100579	up-regulated
MAP4K4	mitogen-activated protein kinase kinase kinase kinase 4	0.428359	0.0004978	up-regulated
GPS2	G protein pathway suppressor 2	0.209724	0.000482381	up-regulated
ZBTB18	zinc finger and BTB domain containing 18	0.349346	0.000635553	up-regulated
RPS16	ribosomal protein S16	0.215097	0.000841915	up-regulated
CDC42SE1	CDC42 small effector 1	0.400552	0.000575129	up-regulated
SLC5A3	solute carrier family 5 member 3	0.717398	0.000560647	up-regulated
SMARCC1	SWI/SNF related, matrix associated, actin dependent regulator of chromatin subfamily c member 1	0.467518	0.000618069	up-regulated
CALD1	caldesmon 1	0.62501	0.000948253	up-regulated
BCL2	BCL2 apoptosis regulator	0.499392	0.000778447	up-regulated
APBA3	amyloid beta precursor protein binding family A member 3	0.233044	0.000587458	up-regulated
SLC38A2	solute carrier family 38 member 2	0.630681	0.000561822	up-regulated
CAPN2	calpain 2	0.331935	0.000654103	up-regulated
TGM2	transglutaminase 2	0.635496	0.000780652	up-regulated
RPS6KA1	ribosomal protein S6 kinase A1	0.368288	0.000730119	up-regulated
THRA	thyroid hormone receptor alpha	0.243264	0.000715522	up-regulated
TCF7	transcription factor 7	0.214181	0.000721517	up-regulated
CNPPD1	cyclin Pas1/PHO80 domain containing 1	0.208863	0.000841214	up-regulated
RAPGEF5	Rap guanine nucleotide exchange factor 5	0.442463	0.000630604	up-regulated
RO60	Ro60, Y RNA binding protein	0.298211	0.000674789	up-regulated
CACFD1	calcium channel flower domain containing 1	0.137415	0.000726774	up-regulated
DAPP1	dual adaptor of phosphotyrosine and 3-phosphoinositides 1	0.213569	0.000796602	up-regulated
RBL2	RB transcriptional corepressor like 2	0.268493	0.000854504	up-regulated
CABIN1	calcineurin binding protein 1	0.251568	0.000951515	up-regulated
CRY1	cryptochrome circadian regulator 1	0.348794	0.000978752	up-regulated
CTNNAL1	catenin alpha like 1	0.31633	0.00124522	up-regulated
TNKS2	tankyrase 2	0.301268	0.0012636	up-regulated
TRPS1	transcriptional repressor GATA binding 1	0.440066	0.00112123	up-regulated
FBXL7	F-box and leucine rich repeat protein 7	0.260041	0.00126332	up-regulated
TCOF1	treacle ribosome biogenesis factor 1	0.24769	0.00152792	up-regulated
ZNF143	zinc finger protein 143	0.282483	0.0012053	up-regulated
SPRY2	sprouty RTK signaling antagonist 2	0.331579	0.00157396	up-regulated
MAPKAPK2	MAPK activated protein kinase 2	0.185012	0.00140276	up-regulated
PATZ1	POZ/BTB and AT hook containing zinc finger 1	0.175943	0.00150473	up-regulated
POLR1B	RNA polymerase I subunit B	0.448519	0.00151788	up-regulated
SRSF11	serine and arginine rich splicing factor 11	0.450637	0.00153448	up-regulated
SCARB1	scavenger receptor class B member 1	0.282323	0.00126622	up-regulated
DMPK	DM1 protein kinase	0.120085	0.000589493	up-regulated
GBF1	golgi brefeldin A resistant guanine nucleotide exchange factor 1	-0.192331	0.00137804	down-regulated
DDX1	DEAD-box helicase 1	-0.354243	0.00154319	down-regulated
UGP2	UDP-glucose pyrophosphorylase 2	-0.369449	0.00138681	down-regulated
COX7B	cytochrome c oxidase subunit 7B	-0.298446	0.0012603	down-regulated
TACO1	translational activator of cytochrome c oxidase I	-0.260218	0.00142594	down-regulated
MPP1	membrane palmitoylated protein 1	-0.354838	0.00127463	down-regulated
CHST1	carbohydrate sulfotransferase 1	-0.457634	0.00133748	down-regulated
GET1	guided entry of tail-anchored proteins factor 1	-0.310408	0.00144939	down-regulated
POLR3C	RNA polymerase III subunit C	-0.183923	0.00156147	down-regulated
CHGA	chromogranin A	-0.476607	0.0013558	down-regulated
IGSF1	immunoglobulin superfamily member 1	-0.484474	0.00117321	down-regulated
USP9X	ubiquitin specific peptidase 9 X-linked	-0.316622	0.00115889	down-regulated
AZIN1	antizyme inhibitor 1	-0.491931	0.00128963	down-regulated
CRAT	carnitine O-acetyltransferase	-0.178664	0.00110638	down-regulated
SLC1A4	solute carrier family 1 member 4	-0.452709	0.00116331	down-regulated
MAGED2	MAGE family member D2	-0.279757	0.000971948	down-regulated
UROD	uroporphyrinogen decarboxylase	-0.277199	0.000968446	down-regulated
MAPK8IP2	mitogen-activated protein kinase 8 interacting protein 2	-0.226806	0.00114938	down-regulated
SPA17	sperm autoantigenic protein 17	-0.343945	0.000972768	down-regulated
PSMA1	proteasome 20S subunit alpha 1	-0.53517	0.00102933	down-regulated
ENTPD4	ectonucleoside triphosphate diphosphohydrolase 4	-0.388895	0.00132339	down-regulated
CARS1	cysteinyl-tRNA synthetase 1	-0.356751	0.00126838	down-regulated
PPP2R3A	protein phosphatase 2 regulatory subunit B''alpha	-0.380185	0.000615853	down-regulated
ATP6V1D	ATPase H+ transporting V1 subunit D	-0.572161	0.000897751	down-regulated
FABP5	fatty acid binding protein 5	-0.507999	0.000840738	down-regulated
TIMM10B	translocase of inner mitochondrial membrane 10B	-0.160265	0.000835821	down-regulated
PSMC6	proteasome 26S subunit, ATPase 6	-0.356912	0.000892172	down-regulated
ATP1A1	ATPase Na+/K+ transporting subunit alpha 1	-0.359403	0.00152378	down-regulated
ARPC1A	actin related protein 2/3 complex subunit 1A	-0.432684	0.0010498	down-regulated
ACTR3	actin related protein 3	-0.44927	0.00082356	down-regulated
SPAG7	sperm associated antigen 7	-0.249758	0.000789388	down-regulated
PPP2R5D	protein phosphatase 2 regulatory subunit B'delta	-0.206439	0.000686477	down-regulated
NHLH2	nescient helix-loop-helix 2	-0.357813	0.000964159	down-regulated
ADARB1	adenosine deaminase RNA specific B1	-0.605527	0.000797547	down-regulated
VPS33B	VPS33B late endosome and lysosome associated	-0.231527	0.000824741	down-regulated
SRP72	signal recognition particle 72	-0.425712	0.0013704	down-regulated
UQCRC1	ubiquinol-cytochrome c reductase core protein 1	-0.461141	0.000700454	down-regulated
RER1	retention in endoplasmic reticulum sorting receptor 1	-0.511358	0.000813589	down-regulated
PCCB	propionyl-CoA carboxylase subunit beta	-0.301941	0.000656279	down-regulated
SGSH	N-sulfoglucosamine sulfohydrolase	-0.376854	0.000730914	down-regulated
SCAMP1	secretory carrier membrane protein 1	-0.53182	0.000846683	down-regulated
ACO2	aconitase 2	-0.30322	0.000805424	down-regulated
COPS7A	COP9 signalosome subunit 7A	-0.403514	0.000573918	down-regulated
RAN	RAN, member RAS oncogene family	-0.370257	0.000740967	down-regulated
GLRB	glycine receptor beta	-0.961583	0.000670751	down-regulated
SRPK2	SRSF protein kinase 2	-0.569323	0.000595014	down-regulated
CDIPT	CDP-diacylglycerol--inositol 3-phosphatidyltransferase	-0.179264	0.000686862	down-regulated
ORC3	origin recognition complex subunit 3	-0.295485	0.000572449	down-regulated
NEDD8	NEDD8 ubiquitin like modifier	-0.323925	0.000715229	down-regulated
GYG1	glycogenin 1	-0.380337	0.00052195	down-regulated
PTBP2	polypyrimidine tract binding protein 2	-0.391837	0.000866205	down-regulated
CAMK2B	calcium/calmodulin dependent protein kinase II beta	-0.931401	0.000622235	down-regulated
GNAO1	G protein subunit alpha o1	-0.526714	0.000684934	down-regulated
ME1	malic enzyme 1	-0.42217	0.000538734	down-regulated
POLR2C	RNA polymerase II subunit C	-0.267955	0.000840548	down-regulated
AKAP6	A-kinase anchoring protein 6	-0.360244	0.00141643	down-regulated
TAC1	tachykinin precursor 1	-1.3407	0.000519252	down-regulated
CALB1	calbindin 1	-1.21459	0.000504546	down-regulated
DCTN6	dynactin subunit 6	-0.306874	0.000541408	down-regulated
ENO2	enolase 2	-0.559501	0.000601213	down-regulated
BPGM	bisphosphoglycerate mutase	-0.25473	0.000461902	down-regulated
PPP2CA	protein phosphatase 2 catalytic subunit alpha	-0.375664	0.000452591	down-regulated
G3BP2	G3BP stress granule assembly factor 2	-0.479858	0.000481838	down-regulated
MSH2	mutS homolog 2	-0.488347	0.000472262	down-regulated
PAM	peptidylglycine alpha-amidating monooxygenase	-0.429702	0.000467407	down-regulated
NDUFB1	NADH:ubiquinone oxidoreductase subunit B1	-0.267346	0.00043664	down-regulated
SLC12A5	solute carrier family 12 member 5	-0.831428	0.000438622	down-regulated
FARSA	phenylalanyl-tRNA synthetase subunit alpha	-0.408217	0.000457698	down-regulated
TRAP1	TNF receptor associated protein 1	-0.229455	0.000709255	down-regulated
PSMA3	proteasome 20S subunit alpha 3	-0.396286	0.000419148	down-regulated
WBP11	WW domain binding protein 11	-0.380571	0.000424411	down-regulated
PSMB5	proteasome 20S subunit beta 5	-0.360344	0.000779117	down-regulated
TCEA2	transcription elongation factor A2	-0.442902	0.000491876	down-regulated
CDC123	cell division cycle 123	-0.315478	0.000372481	down-regulated
NDFIP1	Nedd4 family interacting protein 1	-0.515676	0.000439121	down-regulated
GLO1	glyoxalase I	-0.29685	0.000343333	down-regulated
NDEL1	nudE neurodevelopment protein 1 like 1	-0.320865	0.000388674	down-regulated
COX7A2L	cytochrome c oxidase subunit 7A2 like	-0.284585	0.000336338	down-regulated
PYGL	glycogen phosphorylase L	-0.332366	0.000436092	down-regulated
GCLM	glutamate-cysteine ligase modifier subunit	-0.544574	0.000860272	down-regulated
ATP6V1E1	ATPase H+ transporting V1 subunit E1	-0.411733	0.000442501	down-regulated
PSMD4	proteasome 26S subunit, non-ATPase 4	-0.36404	0.000289755	down-regulated
GNAS	GNAS complex locus	-0.773398	0.000425232	down-regulated
THY1	Thy-1 cell surface antigen	-0.981218	0.000366288	down-regulated
MED4	mediator complex subunit 4	-0.324388	0.000368712	down-regulated
RRAS2	RAS related 2	-0.309737	0.000379214	down-regulated
DNM1	dynamin 1	-1.1291	0.000289479	down-regulated
RCN2	reticulocalbin 2	-0.634118	0.0002996	down-regulated
COPS8	COP9 signalosome subunit 8	-0.478831	0.000256903	down-regulated
SLC25A12	solute carrier family 25 member 12	-0.725345	0.000290104	down-regulated
PCSK2	proprotein convertase subtilisin/kexin type 2	-0.734435	0.000294672	down-regulated
MAPK10	mitogen-activated protein kinase 10	-0.499917	0.000307256	down-regulated
SEM1	SEM1 26S proteasome complex subunit	-0.278582	0.000336715	down-regulated
KPNA2	karyopherin subunit alpha 2	-0.400125	0.000257327	down-regulated
MTX2	metaxin 2	-0.466023	0.000374733	down-regulated
HS2ST1	heparan sulfate 2-O-sulfotransferase 1	-0.340357	0.000292867	down-regulated
ACP1	acid phosphatase 1	-0.464394	0.000215914	down-regulated
NNT	nicotinamide nucleotide transhydrogenase	-0.253326	0.00137382	down-regulated
SRP19	signal recognition particle 19	-0.31417	0.000228228	down-regulated
DNAJC12	DnaJ heat shock protein family (Hsp40) member C12	-0.454989	0.000259973	down-regulated
RNMT	RNA guanine-7 methyltransferase	-0.465644	0.000281991	down-regulated
NDUFB5	NADH:ubiquinone oxidoreductase subunit B5	-0.311991	0.000195664	down-regulated
DIABLO	diablo IAP-binding mitochondrial protein	-0.244629	0.000260238	down-regulated
PFKP	phosphofructokinase, platelet	-0.577839	0.000574776	down-regulated
SUCLA2	succinate-CoA ligase ADP-forming beta subunit	-0.491696	0.000246623	down-regulated
AFF2	AF4/FMR2 family member 2	-0.396124	0.000181386	down-regulated
OXCT1	3-oxoacid CoA-transferase 1	-0.313842	0.000894536	down-regulated
ANOS1	anosmin 1	-0.48925	0.00142294	down-regulated
GSTO1	glutathione S-transferase omega 1	-0.328513	0.000177939	down-regulated
GOT1	glutamic-oxaloacetic transaminase 1	-0.713244	0.000179206	down-regulated
VPS4B	vacuolar protein sorting 4 homolog B	-0.400781	0.00018816	down-regulated
GOT2	glutamic-oxaloacetic transaminase 2	-0.363888	0.000313487	down-regulated
NDUFV2	NADH:ubiquinone oxidoreductase core subunit V2	-0.420119	0.000174983	down-regulated
SCG5	secretogranin V	-0.527962	0.000201221	down-regulated
RTN1	reticulon 1	-0.669976	0.00018972	down-regulated
ARPC5L	actin related protein 2/3 complex subunit 5 like	-0.434567	0.000150688	down-regulated
CSTF3	cleavage stimulation factor subunit 3	-0.465026	0.000197219	down-regulated
PSMB1	proteasome 20S subunit beta 1	-0.332919	0.000192833	down-regulated
AUH	AU RNA binding methylglutaconyl-CoA hydratase	-0.53967	0.000158437	down-regulated
TERF2IP	TERF2 interacting protein	-0.355719	0.000218706	down-regulated
NDUFAB1	NADH:ubiquinone oxidoreductase subunit AB1	-0.428901	0.000142634	down-regulated
CDH10	cadherin 10	-0.350819	0.000319888	down-regulated
TRPV2	transient receptor potential cation channel subfamily V member 2	-0.233362	4.34731e-05	down-regulated
TIMM8B	translocase of inner mitochondrial membrane 8 homolog B	-0.231987	0.00126528	down-regulated
NBEA	neurobeachin	-0.604193	0.000240704	down-regulated
AMPD2	adenosine monophosphate deaminase 2	-0.281209	0.000169527	down-regulated
INA	internexin neuronal intermediate filament protein alpha	-1.25647	0.000142197	down-regulated
PITPNA	phosphatidylinositol transfer protein alpha	-0.542951	0.000133666	down-regulated
PFN2	profilin 2	-0.387884	0.000193311	down-regulated
MRPS7	mitochondrial ribosomal protein S7	-0.43432	0.000126784	down-regulated
POLR2K	RNA polymerase II subunit K	-0.371828	0.000146633	down-regulated
RAB2A	RAB2A, member RAS oncogene family	-0.645683	0.000868573	down-regulated
IDH3B	isocitrate dehydrogenase (NAD(+)) 3 non-catalytic subunit beta	-0.703557	0.000175338	down-regulated
STAT1	signal transducer and activator of transcription 1	-0.434787	0.00021831	down-regulated
SC5D	sterol-C5-desaturase	-0.481138	0.00149077	down-regulated
TM2D1	TM2 domain containing 1	-0.379558	0.000242942	down-regulated
PDHX	pyruvate dehydrogenase complex component X	-0.431933	0.000125718	down-regulated
NDUFB6	NADH:ubiquinone oxidoreductase subunit B6	-0.252181	0.000131586	down-regulated
VAMP4	vesicle associated membrane protein 4	-0.258071	0.000124244	down-regulated
DCTN2	dynactin subunit 2	-0.262339	0.000175845	down-regulated
APEX1	apurinic/apyrimidinic endodeoxyribonuclease 1	-0.243702	0.00155367	down-regulated
RBKS	ribokinase	-0.348562	0.000103501	down-regulated
INPP4A	inositol polyphosphate-4-phosphatase type I A	-0.691554	0.00013703	down-regulated
DMTN	dematin actin binding protein	-0.529546	0.000101292	down-regulated
RAP1GDS1	Rap1 GTPase-GDP dissociation stimulator 1	-0.566025	0.000136489	down-regulated
PIK3R3	phosphoinositide-3-kinase regulatory subunit 3	-0.41613	9.63847e-05	down-regulated
ME2	malic enzyme 2	-0.441972	9.95793e-05	down-regulated
OSBP	oxysterol binding protein	-0.322649	0.000103521	down-regulated
PWP1	PWP1 homolog, endonuclein	-0.696632	8.87857e-05	down-regulated
SLC25A4	solute carrier family 25 member 4	-0.502902	0.000124521	down-regulated
ATP5PO	ATP synthase peripheral stalk subunit OSCP	-0.384468	8.918e-05	down-regulated
ACAT1	acetyl-CoA acetyltransferase 1	-0.355045	0.000120809	down-regulated
CETN2	centrin 2	-0.397382	7.89309e-05	down-regulated
F8	coagulation factor VIII	-0.294353	8.1631e-05	down-regulated
RALB	RAS like proto-oncogene B	-0.349663	8.84615e-05	down-regulated
ADD2	adducin 2	-0.90059	0.000880531	down-regulated
PALM2AKAP2	PALM2 and AKAP2 fusion	-0.743501	8.82285e-05	down-regulated
CSNK1D	casein kinase 1 delta	-0.305665	0.000171901	down-regulated
ASH2L	ASH2 like, histone lysine methyltransferase complex subunit	-0.292215	8.26119e-05	down-regulated
ATP6V1G1	ATPase H+ transporting V1 subunit G1	-0.475381	0.000117263	down-regulated
PNMA2	PNMA family member 2	-0.724859	8.0223e-05	down-regulated
AIMP2	aminoacyl tRNA synthetase complex interacting multifunctional protein 2	-0.349903	9.34671e-05	down-regulated
OLFM1	olfactomedin 1	-0.640695	0.000104101	down-regulated
NEFM	neurofilament medium	-1.15588	8.24788e-05	down-regulated
SLC35E3	solute carrier family 35 member E3	-0.360352	7.63746e-05	down-regulated
NEFH	neurofilament heavy	-1.11336	8.40723e-05	down-regulated
PFDN4	prefoldin subunit 4	-0.360282	6.93076e-05	down-regulated
MKRN1	makorin ring finger protein 1	-0.485186	8.5601e-05	down-regulated
B4GAT1	beta-1,4-glucuronyltransferase 1	-0.469635	0.00112171	down-regulated
HMG20A	high mobility group 20A	-0.356639	0.000105814	down-regulated
UROS	uroporphyrinogen III synthase	-0.666948	0.000595636	down-regulated
CEND1	cell cycle exit and neuronal differentiation 1	-0.355761	0.000100071	down-regulated
TENM1	teneurin transmembrane protein 1	-0.676859	7.78997e-05	down-regulated
RBP1	retinol binding protein 1	-0.402847	7.48553e-05	down-regulated
CHL1	cell adhesion molecule L1 like	-0.696056	7.32729e-05	down-regulated
PSMA5	proteasome 20S subunit alpha 5	-0.450073	6.33855e-05	down-regulated
OPTN	optineurin	-0.435626	6.41185e-05	down-regulated
MRPS15	mitochondrial ribosomal protein S15	-0.474824	6.46112e-05	down-regulated
AFG3L2	AFG3 like matrix AAA peptidase subunit 2	-0.401096	7.48758e-05	down-regulated
MAP2	microtubule associated protein 2	-0.368892	7.79753e-05	down-regulated
LIN7B	lin-7 homolog B, crumbs cell polarity complex component	-0.551686	0.00122897	down-regulated
PCMT1	protein-L-isoaspartate (D-aspartate) O-methyltransferase	-0.518375	6.04295e-05	down-regulated
NEFL	neurofilament light	-1.37765	5.78586e-05	down-regulated
TM7SF2	transmembrane 7 superfamily member 2	-0.361056	5.68577e-05	down-regulated
NPTN	neuroplastin	-0.621359	6.22978e-05	down-regulated
CLGN	calmegin	-0.409375	6.66256e-05	down-regulated
DNM1L	dynamin 1 like	-0.425183	5.45319e-05	down-regulated
SLC7A8	solute carrier family 7 member 8	-0.277778	4.4413e-05	down-regulated
INPP4B	inositol polyphosphate-4-phosphatase type II B	-0.362123	4.38655e-05	down-regulated
MYL12B	myosin light chain 12B	-0.191962	0.0003909	down-regulated
KATNB1	katanin regulatory subunit B1	-0.40178	0.000633478	down-regulated
ADH5	alcohol dehydrogenase 5 (class III), chi polypeptide	-0.468986	4.95873e-05	down-regulated
KIF3A	kinesin family member 3A	-0.740478	5.16531e-05	down-regulated
SEZ6L	seizure related 6 homolog like	-0.433616	9.02484e-05	down-regulated
STXBP1	syntaxin binding protein 1	-0.651161	8.7261e-05	down-regulated
SRPRB	SRP receptor subunit beta	-0.428854	4.84603e-05	down-regulated
BCAT1	branched chain amino acid transaminase 1	-0.389543	4.78741e-05	down-regulated
ATP5MC1	ATP synthase membrane subunit c locus 1	-0.345434	0.000560555	down-regulated
ST6GALNAC5	ST6 N-acetylgalactosaminide alpha-2,6-sialyltransferase 5	-0.676674	3.84487e-05	down-regulated
NDUFA3	NADH:ubiquinone oxidoreductase subunit A3	-0.323863	0.00118491	down-regulated
NLK	nemo like kinase	-0.483763	4.80892e-05	down-regulated
AP3B2	adaptor related protein complex 3 subunit beta 2	-0.607012	0.000219308	down-regulated
MAD2L1	mitotic arrest deficient 2 like 1	-0.284387	3.97075e-05	down-regulated
ATP6V1C1	ATPase H+ transporting V1 subunit C1	-0.751374	3.44982e-05	down-regulated
ATP5MC3	ATP synthase membrane subunit c locus 3	-0.55077	3.71059e-05	down-regulated
ATP6V1F	ATPase H+ transporting V1 subunit F	-0.307249	5.03997e-05	down-regulated
PYROXD1	pyridine nucleotide-disulphide oxidoreductase domain 1	-0.669134	5.36011e-05	down-regulated
SLC1A1	solute carrier family 1 member 1	-0.520642	3.18295e-05	down-regulated
GPX3	glutathione peroxidase 3	-0.884743	3.87254e-05	down-regulated
RAB11A	RAB11A, member RAS oncogene family	-0.487143	3.26551e-05	down-regulated
TTC1	tetratricopeptide repeat domain 1	-0.411653	2.81129e-05	down-regulated
PEX11B	peroxisomal biogenesis factor 11 beta	-0.612668	3.35423e-05	down-regulated
LAPTM4B	lysosomal protein transmembrane 4 beta	-0.67481	2.64991e-05	down-regulated
SNAP25	synaptosome associated protein 25	-1.55812	2.99779e-05	down-regulated
MRPS35	mitochondrial ribosomal protein S35	-0.277513	3.29932e-05	down-regulated
CDO1	cysteine dioxygenase type 1	-0.523661	6.23344e-05	down-regulated
PSMD8	proteasome 26S subunit, non-ATPase 8	-0.542338	3.18568e-05	down-regulated
YWHAZ	tyrosine 3-monooxygenase/tryptophan 5-monooxygenase activation protein zeta	-0.762499	2.92507e-05	down-regulated
NDUFA10	NADH:ubiquinone oxidoreductase subunit A10	-0.390791	4.65765e-05	down-regulated
SLC9A6	solute carrier family 9 member A6	-0.520421	0.000482565	down-regulated
PSMB4	proteasome 20S subunit beta 4	-0.44777	4.27505e-05	down-regulated
ZMYM4	zinc finger MYM-type containing 4	-0.427693	2.80403e-05	down-regulated
HPCAL4	hippocalcin like 4	-0.497319	0.000860731	down-regulated
TUSC2	tumor suppressor 2, mitochondrial calcium regulator	-0.330303	2.97428e-05	down-regulated
PSME3	proteasome activator subunit 3	-0.59048	2.19792e-05	down-regulated
TIMM17A	translocase of inner mitochondrial membrane 17A	-0.542437	2.11427e-05	down-regulated
SNX4	sorting nexin 4	-0.615283	2.44078e-05	down-regulated
PDHB	pyruvate dehydrogenase E1 beta subunit	-0.369697	5.15098e-05	down-regulated
NDRG4	NDRG family member 4	-1.01565	2.47865e-05	down-regulated
MTCH2	mitochondrial carrier 2	-0.431266	2.24094e-05	down-regulated
TIMM10	translocase of inner mitochondrial membrane 10	-0.310824	9.02459e-05	down-regulated
BRD3OS	BRD3 opposite strand	-0.602258	1.94479e-05	down-regulated
ACLY	ATP citrate lyase	-0.393768	0.00027355	down-regulated
NCAPG	non-SMC condensin I complex subunit G	-0.407091	2.02437e-05	down-regulated
EIF3K	eukaryotic translation initiation factor 3 subunit K	-0.369846	1.60555e-05	down-regulated
PSMD11	proteasome 26S subunit, non-ATPase 11	-0.375015	2.03222e-05	down-regulated
GSTA4	glutathione S-transferase alpha 4	-0.462279	1.79082e-05	down-regulated
NDUFA2	NADH:ubiquinone oxidoreductase subunit A2	-0.347953	1.27822e-05	down-regulated
CAP2	cyclase associated actin cytoskeleton regulatory protein 2	-0.737621	7.33418e-05	down-regulated
RPP40	ribonuclease P/MRP subunit p40	-0.517717	1.14445e-05	down-regulated
RBFOX2	RNA binding fox-1 homolog 2	-0.710399	1.6685e-05	down-regulated
SMARCA4	SWI/SNF related, matrix associated, actin dependent regulator of chromatin, subfamily a, member 4	-0.487599	1.34419e-05	down-regulated
SCFD1	sec1 family domain containing 1	-0.292243	0.000510162	down-regulated
DDX42	DEAD-box helicase 42	-0.426174	1.20776e-05	down-regulated
IDS	iduronate 2-sulfatase	-0.585097	1.39824e-05	down-regulated
MMD	monocyte to macrophage differentiation associated	-0.504901	1.19089e-05	down-regulated
RNF14	ring finger protein 14	-0.626747	1.0971e-05	down-regulated
RGS7	regulator of G protein signaling 7	-0.809611	1.3301e-05	down-regulated
UBXN8	UBX domain protein 8	-0.372524	0.00142038	down-regulated
MCF2	MCF.2 cell line derived transforming sequence	-0.68754	1.14431e-05	down-regulated
CHN1	chimerin 1	-0.571601	3.51637e-05	down-regulated
NDUFA5	NADH:ubiquinone oxidoreductase subunit A5	-0.59268	1.07672e-05	down-regulated
PBLD	phenazine biosynthesis like protein domain containing	-0.493721	0.00146679	down-regulated
STAM	signal transducing adaptor molecule	-0.643076	1.30862e-05	down-regulated
PLCB4	phospholipase C beta 4	-1.15204	0.000389844	down-regulated
USP14	ubiquitin specific peptidase 14	-0.330494	9.84275e-06	down-regulated
UBE2V2	ubiquitin conjugating enzyme E2 V2	-0.60384	1.08252e-05	down-regulated
TXNL4A	thioredoxin like 4A	-0.431295	1.059e-05	down-regulated
PSMD2	proteasome 26S subunit, non-ATPase 2	-0.380495	1.07255e-05	down-regulated
TUBB4B	tubulin beta 4B class IVb	-0.60528	1.30975e-05	down-regulated
ALAS1	5'-aminolevulinate synthase 1	-0.407266	1.39372e-05	down-regulated
GHITM	growth hormone inducible transmembrane protein	-0.526362	9.59952e-06	down-regulated
NSG1	neuronal vesicle trafficking associated 1	-1.52645	1.81305e-05	down-regulated
VDAC3	voltage dependent anion channel 3	-0.659613	9.4726e-06	down-regulated
STX18	syntaxin 18	-0.450037	8.99115e-06	down-regulated
MDH1	malate dehydrogenase 1	-0.870928	1.05556e-05	down-regulated
HSPA13	heat shock protein family A (Hsp70) member 13	-0.569165	8.17676e-06	down-regulated
RIT2	Ras like without CAAX 2	-0.68049	1.01354e-05	down-regulated
IDI1	isopentenyl-diphosphate delta isomerase 1	-0.432086	7.71303e-06	down-regulated
CIRBP	cold inducible RNA binding protein	-0.917069	8.83878e-06	down-regulated
GUCY1B1	guanylate cyclase 1 soluble subunit beta 1	-0.868548	6.93776e-06	down-regulated
CACNA2D2	calcium voltage-gated channel auxiliary subunit alpha2delta 2	-0.604115	9.13576e-06	down-regulated
RAP1GAP	RAP1 GTPase activating protein	-0.619011	8.26656e-06	down-regulated
ATP8A2	ATPase phospholipid transporting 8A2	-0.867522	6.17077e-06	down-regulated
SCG3	secretogranin III	-0.633058	9.03327e-06	down-regulated
POP4	POP4 homolog, ribonuclease P/MRP subunit	-0.666531	5.55676e-06	down-regulated
ASAH1	N-acylsphingosine amidohydrolase 1	-0.476062	5.89926e-06	down-regulated
GNAL	G protein subunit alpha L	-0.722967	6.25584e-06	down-regulated
PAIP1	poly(A) binding protein interacting protein 1	-0.728492	5.44317e-06	down-regulated
SYNGR1	synaptogyrin 1	-0.575614	2.5361e-05	down-regulated
NAP1L2	nucleosome assembly protein 1 like 2	-0.880368	1.1636e-05	down-regulated
XK	X-linked Kx blood group	-0.627545	6.68261e-06	down-regulated
PFKM	phosphofructokinase, muscle	-0.605848	0.00017079	down-regulated
SPHK2	sphingosine kinase 2	-0.376754	0.00123686	down-regulated
SLC30A9	solute carrier family 30 member 9	-0.411225	6.13589e-06	down-regulated
ATP6V0E2	ATPase H+ transporting V0 subunit e2	-0.568002	8.75781e-06	down-regulated
ORC5	origin recognition complex subunit 5	-0.472044	0.000939663	down-regulated
CCDC6	coiled-coil domain containing 6	-0.269195	2.6954e-05	down-regulated
ME3	malic enzyme 3	-0.587158	0.000164842	down-regulated
GABBR2	gamma-aminobutyric acid type B receptor subunit 2	-1.26423	5.30461e-06	down-regulated
KIF3C	kinesin family member 3C	-0.879264	5.37064e-06	down-regulated
PSMG1	proteasome assembly chaperone 1	-0.474479	5.56081e-06	down-regulated
CHCHD2	coiled-coil-helix-coiled-coil-helix domain containing 2	-0.450818	5.58089e-06	down-regulated
PSMD12	proteasome 26S subunit, non-ATPase 12	-0.871062	3.9932e-06	down-regulated
CES2	carboxylesterase 2	-0.416412	6.73805e-05	down-regulated
VWA5A	von Willebrand factor A domain containing 5A	-0.644273	4.68455e-06	down-regulated
MX1	MX dynamin like GTPase 1	-0.632202	0.00023773	down-regulated
TAGLN3	transgelin 3	-0.889418	3.6695e-06	down-regulated
GFPT1	glutamine--fructose-6-phosphate transaminase 1	-0.652006	0.000356676	down-regulated
VSNL1	visinin like 1	-1.9221	3.82633e-06	down-regulated
DYNC1I1	dynein cytoplasmic 1 intermediate chain 1	-0.900837	0.00153428	down-regulated
EIF2B3	eukaryotic translation initiation factor 2B subunit gamma	-0.415906	2.90222e-06	down-regulated
STMN2	stathmin 2	-1.87175	5.69774e-06	down-regulated
SULT4A1	sulfotransferase family 4A member 1	-1.30869	2.2095e-05	down-regulated
ATP6V1A	ATPase H+ transporting V1 subunit A	-0.85055	2.63328e-06	down-regulated
ZW10	zw10 kinetochore protein	-0.398141	6.48466e-05	down-regulated
FUCA1	alpha-L-fucosidase 1	-0.491494	1.96647e-06	down-regulated
NDN	necdin, MAGE family member	-0.522425	2.26638e-06	down-regulated
MAPK9	mitogen-activated protein kinase 9	-0.713231	2.84883e-06	down-regulated
UCHL1	ubiquitin C-terminal hydrolase L1	-0.975567	3.28473e-06	down-regulated
RANBP9	RAN binding protein 9	-0.652915	1.92546e-06	down-regulated
NME1	NME/NM23 nucleoside diphosphate kinase 1	-0.667621	0.000348321	down-regulated
KLC1	kinesin light chain 1	-0.873647	2.34195e-06	down-regulated
PLAAT1	phospholipase A and acyltransferase 1	-0.655803	1.67798e-06	down-regulated
STAU2	staufen double-stranded RNA binding protein 2	-0.442234	1.58814e-05	down-regulated
TOR1A	torsin family 1 member A	-0.353076	9.86017e-06	down-regulated
GARS1	glycyl-tRNA synthetase 1	-0.593606	4.10015e-06	down-regulated
PSMD1	proteasome 26S subunit, non-ATPase 1	-0.509368	1.67344e-06	down-regulated
COPS3	COP9 signalosome subunit 3	-0.524427	1.978e-06	down-regulated
SPINT2	serine peptidase inhibitor, Kunitz type 2	-0.537825	3.75942e-05	down-regulated
CRMP1	collapsin response mediator protein 1	-0.579512	2.10083e-06	down-regulated
GCH1	GTP cyclohydrolase 1	-0.996924	0.000540124	down-regulated
CMAS	cytidine monophosphate N-acetylneuraminic acid synthetase	-0.973085	2.14603e-06	down-regulated
FKBP1B	FKBP prolyl isomerase 1B	-0.863998	1.18273e-06	down-regulated
ATXN10	ataxin 10	-0.462185	0.000157645	down-regulated
ATP6V1B2	ATPase H+ transporting V1 subunit B2	-1.10657	1.58886e-06	down-regulated
CDC27	cell division cycle 27	-0.42374	1.3067e-06	down-regulated
KIF2A	kinesin family member 2A	-0.551674	1.94009e-06	down-regulated
GRIA1	glutamate ionotropic receptor AMPA type subunit 1	-1.21899	4.58969e-06	down-regulated
PPME1	protein phosphatase methylesterase 1	-0.383222	0.000125658	down-regulated
KIFAP3	kinesin associated protein 3	-0.778054	1.11072e-06	down-regulated
ASMTL	acetylserotonin O-methyltransferase like	-0.6039	1.15562e-06	down-regulated
ATP5F1B	ATP synthase F1 subunit beta	-0.520627	9.78016e-07	down-regulated
NSF	N-ethylmaleimide sensitive factor, vesicle fusing ATPase	-1.06509	1.24164e-06	down-regulated
RTCA	RNA 3'-terminal phosphate cyclase	-0.668094	8.06694e-07	down-regulated
HMGCS1	3-hydroxy-3-methylglutaryl-CoA synthase 1	-0.532214	0.000153836	down-regulated
AP3M2	adaptor related protein complex 3 subunit mu 2	-0.499881	2.5888e-05	down-regulated
TBCE	tubulin folding cofactor E	-0.664164	3.23058e-06	down-regulated
CHGB	chromogranin B	-1.39855	1.04411e-06	down-regulated
MYG1	#N/A	-0.688783	1.27422e-06	down-regulated
SLC25A32	solute carrier family 25 member 32	-0.679875	9.28778e-07	down-regulated
ZWINT	ZW10 interacting kinetochore protein	-0.381175	3.24418e-07	down-regulated
TXNDC9	thioredoxin domain containing 9	-0.577901	6.36092e-07	down-regulated
PLAA	phospholipase A2 activating protein	-0.378811	8.11107e-07	down-regulated
PPP2R2B	protein phosphatase 2 regulatory subunit Bbeta	-0.45147	5.99696e-07	down-regulated
SYNGR3	synaptogyrin 3	-1.47993	8.23684e-07	down-regulated
PSMB7	proteasome 20S subunit beta 7	-0.443636	4.93663e-07	down-regulated
NDUFS1	NADH:ubiquinone oxidoreductase core subunit S1	-0.682115	1.49931e-06	down-regulated
RUNDC3A	RUN domain containing 3A	-0.791514	9.1932e-07	down-regulated
HARS1	histidyl-tRNA synthetase 1	-0.5683	0.000100505	down-regulated
TUBB3	tubulin beta 3 class III	-0.896372	8.69809e-07	down-regulated
FABP7	fatty acid binding protein 7	-0.971056	5.04576e-07	down-regulated
PDXK	pyridoxal kinase	-0.607845	6.35651e-07	down-regulated
GSS	glutathione synthetase	-0.576128	4.09558e-07	down-regulated
MOAP1	modulator of apoptosis 1	-0.703229	4.54151e-07	down-regulated
L1CAM	L1 cell adhesion molecule	-1.13061	0.000131056	down-regulated
AKAP12	A-kinase anchoring protein 12	-0.827939	6.98688e-07	down-regulated
EN1	engrailed homeobox 1	-1.21141	0.00112123	down-regulated
SRD5A1	steroid 5 alpha-reductase 1	-1.15085	4.51059e-07	down-regulated
DRG1	developmentally regulated GTP binding protein 1	-0.353569	5.81884e-07	down-regulated
MDH2	malate dehydrogenase 2	-0.804839	6.36076e-07	down-regulated
ITPR1	inositol 1,4,5-trisphosphate receptor type 1	-0.818358	0.00126594	down-regulated
PSMD14	proteasome 26S subunit, non-ATPase 14	-0.36439	3.95676e-07	down-regulated
PTPRN2	protein tyrosine phosphatase receptor type N2	-0.772658	3.77884e-07	down-regulated
OCRL	OCRL inositol polyphosphate-5-phosphatase	-0.725267	5.05981e-07	down-regulated
STRAP	serine/threonine kinase receptor associated protein	-0.375028	5.06792e-07	down-regulated
DYNLT3	dynein light chain Tctex-type 3	-0.621755	3.04526e-07	down-regulated
SYT1	synaptotagmin 1	-1.617	4.03093e-07	down-regulated
SCG2	secretogranin II	-1.61986	4.76173e-07	down-regulated
ACOT7	acyl-CoA thioesterase 7	-1.30427	2.30592e-06	down-regulated
GAP43	growth associated protein 43	-1.33271	2.77155e-05	down-regulated
WDR61	WD repeat domain 61	-0.591192	2.49673e-07	down-regulated
BASP1	brain abundant membrane attached signal protein 1	-0.874366	2.73761e-07	down-regulated
SNAPC5	small nuclear RNA activating complex polypeptide 5	-0.473747	2.39811e-07	down-regulated
HMGCR	3-hydroxy-3-methylglutaryl-CoA reductase	-0.865473	0.000153804	down-regulated
TSPAN13	tetraspanin 13	-0.779333	2.7504e-07	down-regulated
NIT2	nitrilase family member 2	-0.619921	1.8113e-07	down-regulated
CYB5R1	cytochrome b5 reductase 1	-0.450979	4.47272e-06	down-regulated
CACNB3	calcium voltage-gated channel auxiliary subunit beta 3	-0.80568	1.98217e-07	down-regulated
ADAM23	ADAM metallopeptidase domain 23	-1.15742	1.77467e-07	down-regulated
AMPH	amphiphysin	-1.87382	1.88177e-07	down-regulated
HK1	hexokinase 1	-0.616547	1.86268e-07	down-regulated
PTS	6-pyruvoyltetrahydropterin synthase	-0.571904	1.08942e-07	down-regulated
SYNJ1	synaptojanin 1	-1.07338	1.08009e-07	down-regulated
HPRT1	hypoxanthine phosphoribosyltransferase 1	-1.26604	1.12652e-07	down-regulated
PDCD2	programmed cell death 2	-0.502967	5.27204e-05	down-regulated
LMO3	LIM domain only 3	-0.699163	9.59682e-08	down-regulated
DDX25	DEAD-box helicase 25	-0.596461	1.3632e-07	down-regulated
QPCT	glutaminyl-peptide cyclotransferase	-0.666387	1.17399e-07	down-regulated
DLD	dihydrolipoamide dehydrogenase	-0.662905	1.12889e-07	down-regulated
GALT	galactose-1-phosphate uridylyltransferase	-0.556417	6.78561e-05	down-regulated
CCNH	cyclin H	-0.539929	8.67829e-08	down-regulated
UBE2N	ubiquitin conjugating enzyme E2 N	-0.978023	6.04359e-08	down-regulated
SNX10	sorting nexin 10	-1.02213	5.72334e-08	down-regulated
NSG2	neuronal vesicle trafficking associated 2	-1.31782	8.15697e-08	down-regulated
NME5	NME/NM23 family member 5	-0.674935	4.53775e-08	down-regulated
DCTN3	dynactin subunit 3	-0.588196	3.96494e-08	down-regulated
MAGED1	MAGE family member D1	-0.751346	1.41451e-07	down-regulated
CHRNB3	cholinergic receptor nicotinic beta 3 subunit	-0.720686	1.23502e-07	down-regulated
NIPSNAP1	nipsnap homolog 1	-0.380896	3.22472e-07	down-regulated
CRYZL1	crystallin zeta like 1	-0.472756	3.15585e-05	down-regulated
VBP1	VHL binding protein 1	-0.410738	3.72545e-08	down-regulated
RAB6B	RAB6B, member RAS oncogene family	-0.846003	5.71259e-08	down-regulated
CDC42	cell division cycle 42	-1.66368	0.000220469	down-regulated
NELL2	neural EGFL like 2	-0.971494	7.68163e-05	down-regulated
TRIM36	tripartite motif containing 36	-0.929834	3.38129e-08	down-regulated
PPP1R2	protein phosphatase 1 regulatory inhibitor subunit 2	-0.894921	1.68623e-07	down-regulated
CBLN1	cerebellin 1 precursor	-1.27108	1.23446e-06	down-regulated
SNCA	synuclein alpha	-0.894295	3.78472e-08	down-regulated
TRAPPC2L	trafficking protein particle complex 2 like	-0.562547	1.6504e-08	down-regulated
BABAM2	BRISC and BRCA1 A complex member 2	-0.451159	1.96951e-08	down-regulated
DYNC1LI1	dynein cytoplasmic 1 light intermediate chain 1	-0.704814	4.73265e-06	down-regulated
PSMC1	proteasome 26S subunit, ATPase 1	-0.427692	8.79902e-09	down-regulated
PCSK1	proprotein convertase subtilisin/kexin type 1	-1.38252	1.12431e-08	down-regulated
BCAS2	BCAS2 pre-mRNA processing factor	-0.531872	1.00489e-08	down-regulated
COPS4	COP9 signalosome subunit 4	-0.705619	1.33694e-05	down-regulated
ZNF226	zinc finger protein 226	-0.891329	9.57239e-09	down-regulated
SLIT1	slit guidance ligand 1	-1.0248	2.44057e-08	down-regulated
GNG3	G protein subunit gamma 3	-1.30842	1.18165e-07	down-regulated
FIBP	FGF1 intracellular binding protein	-0.646329	2.14389e-08	down-regulated
IMMT	inner membrane mitochondrial protein	-0.665089	8.72868e-09	down-regulated
RGS4	regulator of G protein signaling 4	-2.38659	5.47829e-09	down-regulated
NDUFA9	NADH:ubiquinone oxidoreductase subunit A9	-0.552908	1.33105e-05	down-regulated
NR4A2	nuclear receptor subfamily 4 group A member 2	-1.34142	1.39698e-07	down-regulated
VAV3	vav guanine nucleotide exchange factor 3	-1.22237	4.21461e-09	down-regulated
SCN3B	sodium voltage-gated channel beta subunit 3	-1.57901	3.18675e-06	down-regulated
SHOC2	SHOC2 leucine rich repeat scaffold protein	-0.663468	1.74813e-09	down-regulated
MPPED2	metallophosphoesterase domain containing 2	-1.13409	2.04504e-09	down-regulated
ACP2	acid phosphatase 2, lysosomal	-0.588717	6.21253e-05	down-regulated
ARL1	ADP ribosylation factor like GTPase 1	-0.66653	1.42332e-09	down-regulated
SUB1	SUB1 regulator of transcription	-0.99632	8.35569e-10	down-regulated
PRPS1	phosphoribosyl pyrophosphate synthetase 1	-0.918645	5.91255e-10	down-regulated
RCAN2	regulator of calcineurin 2	-1.10663	6.23568e-10	down-regulated
DCLK1	doublecortin like kinase 1	-1.27755	2.26295e-10	down-regulated
FGF13	fibroblast growth factor 13	-2.18038	1.88013e-10	down-regulated
PTDSS1	phosphatidylserine synthase 1	-0.694759	3.60397e-09	down-regulated
CDK14	cyclin dependent kinase 14	-0.976135	8.09763e-08	down-regulated
PCDH8	protocadherin 8	-2.14102	1.66407e-11	down-regulated
TPBG	trophoblast glycoprotein	-1.51482	4.74471e-07	down-regulated
PRKAR2B	protein kinase cAMP-dependent type II regulatory subunit beta	-1.4002	1.06111e-11	down-regulated
ALDH1A1	aldehyde dehydrogenase 1 family member A1	-2.12386	1.02067e-11	down-regulated
RET	ret proto-oncogene	-2.45109	5.74785e-12	down-regulated
PIP5K1B	phosphatidylinositol-4-phosphate 5-kinase type 1 beta	-1.51472	5.75504e-08	down-regulated
SLC6A3	solute carrier family 6 member 3	-3.12689	6.95577e-12	down-regulated
DLK1	delta like non-canonical Notch ligand 1	-2.12096	1.57433e-05	down-regulated
AGTR1	angiotensin II receptor type 1	-2.18748	6.10623e-13	down-regulated
GBE1	1,4-alpha-glucan branching enzyme 1	-1.54775	2.06057e-13	down-regulated
DDC	dopa decarboxylase	-2.86018	2.59028e-09	down-regulated
SLC18A2	solute carrier family 18 member A2	-3.74454	8.72635e-14	down-regulated
Abbreviations: HGNC, HUGO Gene Nomenclature Committee; FDR, false discovery rate.
